# Supplementary material for: Complete Mitochondrial Genome of the Free-Living Earwig, Challia fletcheri (Dermaptera: Pygidicranidae) and Phylogeny of Polyneoptera
Source: PubMed Central journal article supplement (PMC3412835; doi:10.1371/journal.pone.0042056), 2012-08-06
Supplement: pone.0042056.s003.pdf [file pone.0042056.s003.pdf]

**Table S1 Nucleotide composition and skewness of mitochondrial genomes of Polyneoptera.**

| Taxon                                | Whole genome |      |             |             | PCGs                    |      | <i>rrnL</i> |      | <i>rrnS</i> |      | A+T-rich region |      | Accession number | References  |
|--------------------------------------|--------------|------|-------------|-------------|-------------------------|------|-------------|------|-------------|------|-----------------|------|------------------|-------------|
|                                      | Size (bp)    | AT%  | AT-skewness | GC-skewness | No. codons <sup>a</sup> | AT%  | Size (bp)   | AT%  | Size (bp)   | AT%  | Size (bp)       | AT%  |                  |             |
| Polyneoptera                         |              |      |             |             |                         |      |             |      |             |      |                 |      |                  |             |
| <b>Dermaptera</b>                    |              |      |             |             |                         |      |             |      |             |      |                 |      |                  |             |
| <i>Challia fletcheri</i>             | 20,456       | 72.5 | -0.166      | 0.346       | 3,728                   | 68.5 | 1,334       | 70.9 | 763         | 70.2 | 1,816           | 89.3 | JN651407         | This study  |
| Plecoptera                           |              |      |             |             |                         |      |             |      |             |      |                 |      |                  |             |
| <i>Pteronarcys princeps</i>          | 16,004       | 71.5 | 0.038       | -0.224      | 3,729                   | 70.4 | 1,328       | 73.9 | 793         | 68.6 | 1,158           | 81.3 | AY687866         | [1]         |
| Mantophasmatodea                     |              |      |             |             |                         |      |             |      |             |      |                 |      |                  |             |
| <i>Sclerophasma paretisense</i>      | 15,500       | 75.1 | 0.108       | -0.152      | 3,709                   | 74.0 | 1,313       | 77.2 | 781         | 75.3 | 715             | 84.1 | DQ241798         | [2]         |
| Mantodea                             |              |      |             |             |                         |      |             |      |             |      |                 |      |                  |             |
| <i>Tamolonica tamolana</i>           | 16,055       | 75.3 | 0.059       | -0.236      | 3,706                   | 74.7 | 1,318       | 77.8 | 777         | 75.7 | 970             | 74.7 | DQ241797         | [2]         |
| Blattodea                            |              |      |             |             |                         |      |             |      |             |      |                 |      |                  |             |
| <i>Periplaneta fuliginosa</i>        | 14,996       | 75.2 | 0.121       | -0.167      | 3,712                   | 74.5 | 1,300       | 78.5 | 801         | 75.8 | 208*            | 76.9 | AB126004         | [3]         |
| <i>Blattella germanica</i>           | 15,025       | 74.6 | 0.051       | -0.180      | 3,703                   | 74.2 | 1,300       | 78.2 | 794         | 73.2 | 253             | 75.1 | EU854321         | Unpublished |
| <i>Eupolyphaga sinensis</i>          | 15,553       | 72.0 | 0.122       | -0.250      | 3,721                   | 70.9 | 1,293       | 74.7 | 801         | 72.9 | 857             | 77.8 | FJ830540         | [4]         |
| Grylloblattodea                      |              |      |             |             |                         |      |             |      |             |      |                 |      |                  |             |
| <i>Grylloblatta sculleni</i>         | 15,595       | 70.1 | 0.104       | -0.194      | 3,715                   | 69.1 | 1,313       | 69.7 | 742         | 66.4 | 956*            | 67.0 | DQ241796         | [2]         |
| Phasmatodea                          |              |      |             |             |                         |      |             |      |             |      |                 |      |                  |             |
| <i>Timema californicum</i>           | 14,387       | 72.1 | 0.078       | -0.179      | 3,721                   | 70.7 | 1,318       | 77.8 | 472*        | 71.8 | -               | -    | DQ241799         | [2]         |
| <i>Ramulus hainanense</i>            | 15,590       | 73.1 | 0.176       | -0.215      | 3,685                   | 71.6 | 1,287       | 78.4 | 782         | 76.6 | 977             | 74.7 | FJ156750         | Unpublished |
| <i>Phraortes sp. Iriomote</i>        | 16,867       | 78.8 | 0.182       | -0.142      | 3,677                   | 77.2 | 1,275       | 80.3 | 759         | 79.1 | 2352            | 84.4 | AB477464         | [5]         |
| <i>Ramulus irregulariterdentatus</i> | 16,633       | 76.0 | 0.136       | -0.110      | 3,694                   | 75.5 | 1,291       | 79.8 | 781         | 76.7 | 2,026           | 74.0 | AB477463         | [5]         |
| <i>Phraortes illepidus</i>           | 16,456       | 77.6 | 0.178       | -0.167      | 3,681                   | 76.6 | 1,279       | 79.9 | 764         | 76.1 | 1,903           | 81.7 | AB477460         | [5]         |
| <i>Entoria okinawaensis</i>          | 16,910       | 76.0 | 0.154       | -0.152      | 3,692                   | 75.6 | 1,286       | 79.4 | 780         | 77.7 | 2,304           | 73.1 | AB477459         | [5]         |
| <i>Megacrania alpheus adan</i>       | 17,124       | 76.9 | 0.203       | -0.198      | 3,695                   | 75.5 | 1,288       | 79.3 | 777         | 76.5 | 2,520           | 80.6 | AB477471         | [5]         |
| <i>Heteropteryx dilatata</i>         | 16,618       | 76.1 | 0.186       | -0.205      | 3,691                   | 75.6 | 1,305       | 78.2 | 776         | 75.0 | 1,974           | 76.7 | AB477468         | [5]         |
| <i>Phobaeticus serratipes</i>        | 16,182       | 77.0 | 0.192       | -0.219      | 3,681                   | 75.9 | 1,286       | 80.2 | 758         | 77.6 | 1,608           | 80.7 | AB477467         | [5]         |
| <i>Micadina phluctainoides</i>       | 16,507       | 78.5 | 0.165       | -0.098      | 3,692                   | 76.8 | 1,284       | 81.2 | 764         | 78.8 | 1,842           | 85.0 | AB477466         | [5]         |
| Isoptera                             |              |      |             |             |                         |      |             |      |             |      |                 |      |                  |             |
| <i>Reticulitermes santonenensis</i>  | 16,567       | 66.1 | 0.303       | -0.293      | 3,711                   | 64.5 | 1,313       | 69.4 | 743         | 66.5 | 1,761           | 70.9 | EF206315         | [6]         |
| <i>Reticulitermes hageni</i>         | 16,590       | 65.5 | 0.300       | -0.287      | 3,711                   | 63.7 | 1,315       | 69.9 | 748         | 67.0 | 1,773           | 70.1 | EF206320         | [6]         |
| <i>Reticulitermes virginicus</i>     | 16,573       | 65.9 | 0.298       | -0.295      | 3,711                   | 64.7 | 1,309       | 69.3 | 745         | 66.0 | 1,700           | 68.4 | EF206318         | [6]         |
| <i>Reticulitermes flavipes</i>       | 16,565       | 66.2 | 0.300       | -0.292      | 3,711                   | 64.7 | 1,313       | 69.7 | 742         | 66.4 | 1,760           | 70.5 | EF206314         | [6]         |
| Orthoptera                           |              |      |             |             |                         |      |             |      |             |      |                 |      |                  |             |
| Ensifera                             |              |      |             |             |                         |      |             |      |             |      |                 |      |                  |             |
| <i>Deracantha onos</i>               | 15,650       | 69.2 | 0.036       | -0.287      | 3,729                   | 67.7 | 1,301       | 72.3 | 858         | 70.1 | 815             | 77.8 | EU137664         | [7]         |
| <i>Troglophilus neglectus</i>        | 15,810       | 73.4 | 0.011       | -0.260      | 3,727                   | 72.5 | 1,342       | 76.8 | 785         | 73.1 | 539             | 66.8 | EU938374         | [8]         |
| <i>Anabrus simplex</i>               | 15,766       | 69.4 | 0.030       | -0.276      | 3,725                   | 67.6 | 1,312       | 72.9 | 785         | 68.9 | 986             | 80.1 | EF373911         | [9]         |
| <i>Gampsocleis gratiosa</i>          | 15,929       | 65.3 | 0.062       | -0.300      | 3,729                   | 63.6 | 1,317       | 70.0 | 848         | 67.7 | 1,111           | 67.4 | EU527333         | [10]        |
| <i>Ruspolia dubia</i>                | 14,971       | 70.9 | 0.023       | -0.240      | 3,728                   | 69.9 | 1,302       | 74.4 | 881         | 72.2 | 70              | 71.4 | EF583824         | [11]        |

|                                       |        |      |       |        |       |      |       |      |     |      |       |      |          |             |
|---------------------------------------|--------|------|-------|--------|-------|------|-------|------|-----|------|-------|------|----------|-------------|
| <i>Myrmecophilus manni</i>            | 15,323 | 70.2 | 0.068 | -0.290 | 3,677 | 69.0 | 1,252 | 74.1 | 734 | 69.8 | 789   | 74.5 | EU938370 | [8]         |
| <i>Gryllotalpa orientalis</i>         | 15,521 | 70.5 | 0.045 | -0.302 | 3,672 | 69.4 | 1,247 | 72.5 | 719 | 69.4 | 920   | 74.9 | AY660929 | [12]        |
| <i>Teleogryllus emma</i>              | 15,660 | 73.1 | 0.108 | -0.268 | 3,701 | 72.6 | 1,293 | 75.3 | 812 | 71.7 | 997   | 74.0 | EU557269 | Unpublished |
| <i>Gryllotalpa pluvialis</i>          | 15,525 | 72.2 | 0.042 | -0.306 | 3,689 | 71.1 | 1,236 | 74.9 | 783 | 72.0 | 866   | 77.7 | EU938371 | [8]         |
| <i>Elimaea cheni</i>                  | 15,831 | 72.6 | 0.021 | -0.260 | 3,731 | 71.5 | 1,311 | 76.3 | 828 | 74.5 | 999   | 75.5 | GU323362 | [13]        |
| Caelifera                             |        |      |       |        |       |      |       |      |     |      |       |      |          |             |
| <i>Acrida willemsei</i>               | 15,601 | 76.2 | 0.165 | -0.163 | 3,719 | 75.4 | 1,314 | 78.1 | 718 | 74.9 | 848   | 87.3 | EU938372 | [8]         |
| <i>Schistocerca gregaria gregaria</i> | 15,625 | 73.2 | 0.155 | -0.167 | 3,718 | 72.2 | 1,320 | 75.8 | 813 | 71.1 | 762   | 87.0 | GQ491031 | [14]        |
| <i>Gomphocerus licenti</i>            | 15,597 | 74.8 | 0.141 | -0.143 | 3,716 | 74.3 | 1,315 | 77.4 | 847 | 73.4 | 712   | 83.7 | GQ180102 | Unpublished |
| <i>Arcyptera coreana</i>              | 15,783 | 76.3 | 0.126 | -0.133 | 3,719 | 75.8 | 1,309 | 77.9 | 792 | 74.0 | 945   | 85.7 | GU324311 | Unpublished |
| <i>Chorthippus chinensis</i>          | 15,599 | 75.1 | 0.141 | -0.142 | 3,675 | 74.9 | 1,313 | 77.0 | 843 | 74.7 | 721   | 84.1 | EU029161 | Unpublished |
| <i>Phlaeoba albonema</i>              | 15,657 | 74.1 | 0.150 | -0.165 | 3,721 | 73.5 | 1,312 | 76.1 | 844 | 13.8 | 728   | 83.0 | EU370925 | Unpublished |
| <i>Oxya chinensis</i>                 | 15,443 | 75.9 | 0.123 | -0.132 | 3,728 | 75.1 | 1,317 | 78.6 | 778 | 75.3 | 631   | 87.5 | EF437157 | [15]        |
| <i>Calliptamus italicus</i>           | 15,675 | 73.2 | 0.139 | -0.162 | 3,717 | 72.4 | 1,322 | 75.6 | 801 | 70.5 | 782   | 85.8 | EU938373 | [8]         |
| <i>Primnoa arctica</i>                | 15,628 | 76.1 | 0.134 | -0.139 | 3,719 | 75.2 | 1,312 | 78.8 | 848 | 75.6 | 744   | 88.2 | GU294758 | [16]        |
| <i>Traulia szetschuanensis</i>        | 15,768 | 74.6 | 0.143 | -0.164 | 3,715 | 73.9 | 1,314 | 77.3 | 814 | 72.5 | 922   | 82.5 | EU914849 | Unpublished |
| <i>Ognevia longipennis</i>            | 15,621 | 76.0 | 0.118 | -0.145 | 3,711 | 75.3 | 1,313 | 77.1 | 820 | 75.5 | 774   | 87.6 | EU914848 | Unpublished |
| <i>Oedaleus asiaticus</i>             | 16,259 | 75.4 | 0.195 | -0.184 | 3,716 | 73.9 | 1,318 | 78.2 | 831 | 75.5 | 1,401 | 84.5 | EU513374 | [17]        |
| <i>Gastrimargus marmoratus</i>        | 15,924 | 75.2 | 0.212 | -0.226 | 3,725 | 73.9 | 1,322 | 78.1 | 831 | 75.7 | 1,061 | 84.3 | EU513373 | [17]        |
| <i>Locusta migratoria migratoria</i>  | 16,053 | 75.5 | 0.186 | -0.190 | 3,713 | 74.2 | 1,316 | 78.5 | 834 | 76.3 | 1,243 | 84.6 | EU287446 | Unpublished |
| <i>Locusta migratoria</i>             | 15,722 | 75.3 | 0.183 | -0.182 | 3,713 | 74.1 | 1,314 | 74.1 | 982 | 78.8 | 926   | 85.9 | X80245   | [18]        |
| <i>Locusta migratoria tibetensis</i>  | 15,568 | 75.4 | 0.176 | -0.175 | 3,715 | 74.2 | 1,316 | 78.5 | 833 | 76.0 | 711   | 86.4 | HM219224 | Unpublished |
| <i>Locusta migratoria manilensis</i>  | 15,895 | 75.3 | 0.186 | -0.185 | 3,729 | 74.1 | 1,318 | 78.7 | 831 | 75.5 | 1,034 | 84.8 | GU344101 | Unpublished |
| <i>Atractomorpha sinensis</i>         | 15,558 | 74.3 | 0.161 | -0.175 | 3,712 | 73.6 | 1,311 | 76.2 | 819 | 74.9 | 777   | 81.5 | EU263919 | Unpublished |
| <i>Gomphocerus sibiricus</i>          | 15,571 | 74.7 | 0.137 | -0.136 | 3,720 | 74.3 | 1,315 | 77.4 | 823 | 73.0 | 706   | 82.3 | HM131804 | Unpublished |
| <i>Acrida cinerea</i>                 | 15,599 | 76.1 | 0.166 | -0.159 | 3,720 | 75.3 | 1,316 | 76.8 | 782 | 75.5 | 784   | 87.9 | GU344100 | [19]        |
| <i>Thrinchus schrenkii</i>            | 15,672 | 71.3 | 0.166 | -0.205 | 3,721 | 70.7 | 1,319 | 72.7 | 852 | 70.7 | 748   | 78.6 | GU181288 | [20]        |
| <i>Physemacris variolosa</i>          | 17,004 | 75.5 | 0.158 | -0.245 | 3,711 | 73.3 | 1,313 | 76.7 | 749 | 74.8 | 2,277 | 85.4 | GU945504 | [21]        |
| <i>Xyleus modestus</i>                | 15,723 | 72.4 | 0.171 | -0.193 | 3,714 | 71.3 | 1,326 | 74.5 | 805 | 70.4 | 621   | 84.7 | GU945503 | [21]        |
| <i>Mekongiella xizangensis</i>        | 15,885 | 73.6 | 0.157 | -0.212 | 3,704 | 72.8 | 1,327 | 75.7 | 834 | 73.3 | 1,063 | 78.7 | HM583654 | [22]        |
| <i>Mekongiana xiangchengensis</i>     | 15,567 | 74.6 | 0.146 | -0.187 | 3,717 | 73.9 | 1,331 | 77.2 | 828 | 73.8 | 733   | 82.8 | HM583653 | [22]        |
| <i>Euchorthippus fusigeniculatus</i>  | 15,772 | 75.0 | 0.137 | -0.151 | 3,713 | 74.4 | 1,315 | 77.7 | 832 | 74.8 | 893   | 81.6 | HM583652 | [22]        |
| <i>Gomphocerippus rufus</i>           | 15,598 | 74.4 | 0.141 | -0.156 | 3,721 | 73.6 | 1,311 | 77.4 | 846 | 73.8 | 695   | 82.7 | GU294759 | [16]        |
| <i>Ellipes minuta</i>                 | 15,451 | 66.5 | 0.012 | -0.297 | 3,722 | 64.9 | 1,304 | 70.8 | 777 | 70.1 | 582   | 71.1 | GU945502 | [21]        |

<sup>a</sup>Termination codons were excluded in total codon count; <sup>b</sup>Protein coding genes; -, A+T-rich region was not sequenced or defined; \*, partial sequences.

## References

1. Stewart JB, Beckenbach AT (2006) Insect mitochondrial genomics 2: the complete mitochondrial genome sequence of a giant stonefly, *Pteronarcys princeps*, asymmetric directional mutation bias, and conserved plecopteran A+T-region elements. *Genome* 49: 815-824.

2. Cameron SL, Barker SC, Whiting MF (2006) Mitochondrial genomics and the new insect order Mantophasmatodea. *Mol Phylogenet Evol* 38: 274-279.
3. Yamauchi MM, Miya MU, Nishida M (2004) Use of a PCR-based approach for sequencing whole mitochondrial of insects: two examples (cockroach and dragonfly) based on method developed for decapod crustaceans. *Insect Mol Biol* 13: 435-442.
4. Zhang YY, Xuan WJ, Zhao JL, Zhu CD, Jiang GF (2010) The complete mitochondrial genome of the cockroach *Eupolyphaga sinensis* (Blattaria: Polyphagidae) and the phylogenetic relationships within the Dictyoptera. *Mol Biol Rep* 37: 3509-3516.
5. Kômoto N, Yukuhiro K, Ueda K, Tomita S (2010) Exploring the molecular phylogeny of phasmids with whole mitochondrial genome sequences. *Mol Phylogenet Evol* 58: 43-52.
6. Cameron SL, Whiting MF (2007) Mitochondrial genomic comparisons of the subterranean termites from the genus *Reticulitermes* (Insecta: Isoptera: Rhinotermitidae). *Genome* 50: 188-202.
7. Zhou Z, Huang Y, Shi F, Ye H (2009) The complete mitochondrial genome of *Deracantha onos* (Orthoptera: Bradyporidae). *Mol Biol Rep* 36: 7-12.
8. Fenn JD, Song H, Cameron SL, Whiting MF (2008) A preliminary mitochondrial genome phylogeny of Orthoptera (Insecta) and approaches to maximizing phylogenetic signal found within mitochondrial genome data. *Mol Phylogenet Evol* 49: 59-68.
9. Cameron SL, Barker SC, Whiting MF (2006) Mitochondrial genomics and the new insect order Mantophasmatodea. *Mol Phylogenet Evol* 38: 274-279.
10. Zhou Z, Shi F, Huang Y (2008) The complete mitogenome of the Chinese bush cricket, *Gampsocleis gratiosa* (Orthoptera: Tettigonioidea). *J Genet Genomics* 35: 341-348.

11. Zhou Z, Huang Y, Shi F (2007) The mitochondrial genome of *Ruspolia dubia* (Orthoptera: Conocephalidae) contains a short A+T-rich region of 70 bp in length. *Genome* 50: 855-66.
12. Kim I, Cha SY, Yoon MH, Hwang JS, Lee SM, et al. (2005) The complete nucleotide sequence and gene organization of the mitochondrial genome of the oriental mole cricket, *Gryllotalpa orientalis* (Orthoptera: Gryllotalpidea). *Gene* 353: 155-168.
13. Zhou Z, Ye H, Huang Y, Shi F (2010) The phylogeny of Orthoptera inferred from mtDNA and description of *Elimaea cheni* (Tettigoniidae: Phaneropterinae) mitogenome. *J Genet Genomics* 37: 315-324.
14. Erler S, Ferenz HJ, Moritz RFA, Kaatz HH (2010) Analysis of the mitochondrial genome of *Schistocerca gregaria gregaria* (Orthoptera: Acrididae). *Biol J Linn Soc Lond* 99: 296-305.
15. Zhang C, Huang Y (2008) Complete mitochondrial genome of *Oxya chinensis* (Orthoptera, Acridoidea). *Acta Biochim Biophys Sin* 40: 7-18.
16. Sun H, Zheng Z, Huang Y (2010) Sequence and phylogenetic analysis of complete mitochondrial DNA genomes of two grasshopper species *Gomphocerus rufus* (Linnaeus, 1758) and *Primnoa arctica* (Zhang and Jin, 1985) (Orthoptera: Acridoidea). *Mitochondr DNA* 21: 115-31.
17. Ma C, Liu C, Yang P, Kang L (2009) The complete mitochondrial genomes of two band-winged grasshoppers, *Gastrimargus marmoratus* and *Oedaleus asiaticus*. *BMC Genomics* 10: 156.
18. Flook PK, Klee S, Rowell CHF (1999) Combined molecular phylogenetic analysis of the Orthoptera and its implications for their higher systematics. *Syst Biol* 48: 233-253.
19. Liu N, Huang, Y (2010) Complete mitochondrial genome sequence of *Acrida cinerea* (Acrididae: Orthoptera) and comparative analysis of mitochondrial genomes in Orthoptera. *Comp Funct Genomics* 2010: 319486.
20. Zhang D, Zhi Y, Yin H, Li X, Yin X (2011) The complete mitochondrial genome of *Thrinchus schrenkii* (Orthoptera: Caelifera, Acridoidea,

Pamphagidae). *Mol Biol Rep* 38: 611-619.

21. Sheffield NC, Hiatt KD, Valentine MC, Song H, Whiting MF (2010) Mitochondrial genomics in Orthoptera using MOSAS. *Mitochondr DNA* 21: 87-104.
22. Zhao L, Zheng ZM, HuangY, Sun HM (2010) A comparative analysis of mitochondrial genomes in Orthoptera (Arthropoda: Insecta) and genome descriptions of three Grasshopper species. *Zool Sci* 27: 662-672.
