# Supplementary material for: Complete Mitochondrial Genome of the Free-Living Earwig, Challia fletcheri (Dermaptera: Pygidicranidae) and Phylogeny of Polyneoptera
Source: PubMed Central journal article supplement (PMC3412835; doi:10.1371/journal.pone.0042056), 2012-08-06
Supplement: pone.0042056.s004.pdf [file pone.0042056.s004.pdf]

|                                      |      |      |      |      |      |      |      |      |      |      |      |      |      |      |      |      |
|--------------------------------------|------|------|------|------|------|------|------|------|------|------|------|------|------|------|------|------|
| <i>Reticulitermes santonensis</i>    | 30.3 | 30.3 | 16.4 | 23.0 | 18.4 | 43.8 | 21.8 | 16.0 | 38.4 | 32.3 | 17.5 | 11.8 | 29.0 | 35.4 | 18.6 | 17.0 |
| <i>Reticulitermes hageni</i>         | 30.1 | 29.9 | 17.0 | 23.1 | 18.4 | 43.7 | 21.9 | 16.1 | 37.7 | 31.5 | 18.0 | 12.8 | 28.7 | 35.0 | 18.9 | 17.3 |
| <i>Reticulitermes virginicus</i>     | 30.4 | 30.2 | 16.7 | 22.8 | 18.4 | 43.8 | 21.8 | 16.0 | 39.0 | 32.2 | 17.2 | 11.6 | 29.2 | 35.4 | 18.5 | 16.8 |
| <i>Reticulitermes flavipes</i>       | 30.4 | 30.2 | 16.5 | 23.0 | 18.4 | 43.8 | 21.8 | 16.1 | 38.8 | 32.3 | 17.4 | 11.4 | 29.2 | 35.4 | 18.5 | 16.8 |
| Orthoptera                           |      |      |      |      |      |      |      |      |      |      |      |      |      |      |      |      |
| <i>Deracantha onos</i>               | 30.2 | 33.2 | 15.5 | 21.2 | 19.2 | 45.2 | 20.7 | 14.9 | 37.3 | 38.3 | 15.2 | 9.2  | 28.9 | 38.9 | 17.1 | 15.1 |
| <i>Troglophilus neglectus</i>        | 30.6 | 34.3 | 14.6 | 20.6 | 19.1 | 45.2 | 20.9 | 14.9 | 41.9 | 46.4 | 7.5  | 4.2  | 30.5 | 42.0 | 14.3 | 13.2 |
| <i>Anabrus simplex</i>               | 30.0 | 32.7 | 15.7 | 21.6 | 19.0 | 45.4 | 20.9 | 14.7 | 35.1 | 40.6 | 14.7 | 9.6  | 28.1 | 39.6 | 17.1 | 15.3 |
| <i>Gampsocleis gratiosa</i>          | 29.6 | 31.1 | 17.2 | 22.1 | 18.9 | 44.9 | 21.0 | 15.2 | 31.8 | 34.5 | 20.6 | 13.2 | 26.7 | 36.8 | 19.6 | 16.8 |
| <i>Ruspolia dubia</i>                | 29.5 | 34.5 | 14.2 | 21.8 | 19.0 | 45.2 | 20.8 | 15.0 | 39.0 | 42.6 | 11.2 | 7.3  | 29.2 | 40.7 | 15.4 | 14.7 |
| <i>Myrmecophilus manni</i>           | 32.1 | 32.0 | 15.6 | 20.2 | 18.6 | 46.0 | 20.3 | 15.1 | 38.5 | 39.7 | 13.7 | 8.1  | 29.7 | 39.2 | 16.6 | 14.5 |
| <i>Gryllotalpa orientalis</i>        | 30.5 | 33.8 | 15.0 | 20.8 | 18.9 | 45.9 | 20.2 | 15.1 | 38.1 | 41.1 | 12.7 | 8.1  | 29.2 | 40.3 | 16.0 | 14.6 |
| <i>Teleogryllus emma</i>             | 31.8 | 36.5 | 13.4 | 18.5 | 23.3 | 44.5 | 17.5 | 14.7 | 38.0 | 43.6 | 10.6 | 7.8  | 31.0 | 41.5 | 13.8 | 13.6 |
| <i>Gryllotalpa pluvialis</i>         | 30.6 | 34.5 | 14.3 | 20.6 | 19.0 | 45.9 | 20.0 | 15.2 | 40.3 | 43.3 | 10.3 | 6.2  | 29.9 | 41.2 | 14.9 | 14.0 |
| <i>Elimaea cheni</i>                 | 30.6 | 35.3 | 13.8 | 20.4 | 19.2 | 45.7 | 20.0 | 15.1 | 41.1 | 42.5 | 9.7  | 6.7  | 30.3 | 41.2 | 14.5 | 14.1 |
| <i>Acrida willemsei</i>              | 34.5 | 35.3 | 11.5 | 18.6 | 20.0 | 46.1 | 19.8 | 14.2 | 45.0 | 45.2 | 5.6  | 4.2  | 33.2 | 42.2 | 12.3 | 12.3 |
| <i>Schistocerca gregaria</i>         | 31.3 | 33.8 | 13.7 | 21.2 | 19.6 | 45.2 | 20.8 | 14.5 | 42.3 | 44.2 | 8.0  | 5.4  | 31.1 | 41.1 | 14.2 | 13.7 |
| <i>Gomphoceris licenti</i>           | 31.4 | 35.7 | 12.4 | 20.5 | 19.7 | 46.0 | 20.1 | 14.2 | 43.3 | 46.7 | 5.5  | 4.5  | 31.4 | 42.8 | 12.7 | 13.1 |
| <i>Arcyptera coreana</i>             | 34.1 | 35.3 | 11.7 | 19.0 | 19.8 | 46.3 | 19.7 | 14.2 | 42.2 | 46.7 | 5.0  | 3.1  | 33.0 | 42.8 | 12.1 | 12.1 |
| <i>Chorthippus chinensis</i>         | 33.9 | 35.8 | 11.8 | 18.5 | 19.8 | 46.2 | 20.3 | 13.8 | 43.4 | 45.9 | 5.6  | 5.1  | 32.3 | 42.6 | 12.6 | 12.5 |
| <i>Phlaeoba albonema</i>             | 32.5 | 34.7 | 12.6 | 20.3 | 19.8 | 45.4 | 20.3 | 14.5 | 43.5 | 44.6 | 6.7  | 5.2  | 31.9 | 41.6 | 13.2 | 13.3 |
| <i>Oxya chinensis</i>                | 32.3 | 36.4 | 11.6 | 19.8 | 19.7 | 46.1 | 20.0 | 14.3 | 43.9 | 47.2 | 5.2  | 3.7  | 32.0 | 43.2 | 12.2 | 12.6 |
| <i>Calliptamus italicus</i>          | 31.2 | 34.7 | 13.1 | 21.0 | 19.5 | 45.4 | 20.6 | 14.5 | 42.7 | 43.6 | 8.1  | 5.6  | 31.2 | 41.2 | 13.9 | 13.7 |
| <i>Prumna arctica</i>                | 33.1 | 35.7 | 12.4 | 18.8 | 19.8 | 46.3 | 19.8 | 14.1 | 44.2 | 46.5 | 5.7  | 3.7  | 32.4 | 42.8 | 12.6 | 12.2 |
| <i>Traulia szetschuanensis</i>       | 32.9 | 35.1 | 12.5 | 19.5 | 19.7 | 46.0 | 20.0 | 14.3 | 43.3 | 44.7 | 6.6  | 5.4  | 32.0 | 41.9 | 13.1 | 13.1 |
| <i>Ognevia longipennis</i>           | 33.3 | 35.9 | 12.1 | 18.7 | 19.8 | 46.8 | 19.2 | 14.3 | 43.7 | 46.2 | 5.5  | 4.5  | 32.3 | 43.0 | 12.3 | 12.5 |
| <i>Oedaleus decorus asiaticus</i>    | 34.2 | 34.4 | 12.5 | 18.3 | 19.9 | 45.7 | 20.2 | 14.2 | 45.8 | 41.5 | 8.1  | 4.6  | 45.0 | 30.4 | 14.6 | 10.0 |
| <i>Gastrimargus marmoratus</i>       | 34.5 | 34.8 | 12.3 | 18.4 | 20.2 | 45.7 | 19.9 | 14.2 | 45.2 | 41.3 | 8.8  | 4.7  | 33.3 | 40.6 | 13.7 | 12.4 |
| <i>Locusta migratoria migratoria</i> | 33.8 | 35.0 | 12.5 | 18.8 | 20.4 | 45.8 | 19.9 | 14.0 | 44.5 | 43.2 | 8.0  | 4.3  | 32.9 | 41.2 | 13.5 | 12.4 |
| <i>Locusta migratoria</i>            | 33.8 | 35.0 | 12.4 | 18.8 | 20.4 | 45.7 | 20.0 | 19.9 | 44.4 | 43.0 | 8.0  | 4.6  | 32.9 | 41.3 | 13.5 | 12.3 |

|                                      |      |      |      |      |      |      |      |      |      |      |      |      |      |      |      |      |
|--------------------------------------|------|------|------|------|------|------|------|------|------|------|------|------|------|------|------|------|
| <i>Locusta migratoria tibetensis</i> | 33.7 | 34.9 | 12.5 | 18.9 | 20.4 | 45.8 | 19.8 | 14.0 | 44.7 | 43.1 | 8.1  | 4.2  | 32.9 | 41.3 | 13.5 | 12.4 |
| <i>Locusta migratoria manilensis</i> | 33.8 | 35.0 | 12.4 | 18.8 | 20.2 | 45.8 | 19.9 | 14.1 | 44.7 | 42.8 | 8.1  | 4.4  | 32.9 | 41.2 | 13.5 | 12.4 |
| <i>Atractomorpha sinensis</i>        | 33.8 | 35.6 | 11.8 | 18.8 | 19.8 | 46.4 | 19.3 | 14.5 | 41.5 | 43.5 | 8.4  | 6.6  | 31.7 | 41.9 | 13.2 | 13.3 |
| <i>Gomphocerus sibiricus</i>         | 32.6 | 35.2 | 12.3 | 20.0 | 19.7 | 45.8 | 20.3 | 19.7 | 42.9 | 46.7 | 5.6  | 4.8  | 31.7 | 42.6 | 12.7 | 13.0 |
| <i>Acrida cinerea</i>                | 34.7 | 35.2 | 11.7 | 18.5 | 19.8 | 46.1 | 19.9 | 19.8 | 45.2 | 45.0 | 5.6  | 4.3  | 33.2 | 42.1 | 12.4 | 12.4 |
| <i>Thrinchus schrenkii</i>           | 31.6 | 33.1 | 14.6 | 20.7 | 19.4 | 44.9 | 21.0 | 14.7 | 40.2 | 43.0 | 9.7  | 7.2  | 30.4 | 40.3 | 15.1 | 14.2 |
| <i>Physemacris variolosa</i>         | 36.0 | 34.1 | 12.9 | 17.0 | 20.2 | 46.0 | 19.8 | 14.0 | 44.0 | 39.6 | 11.1 | 5.4  | 33.4 | 39.9 | 14.6 | 12.2 |
| <i>Xyleus modestus</i>               | 31.7 | 33.3 | 13.8 | 21.1 | 19.2 | 45.5 | 20.4 | 14.9 | 41.4 | 42.8 | 9.0  | 6.8  | 30.8 | 40.5 | 14.4 | 14.3 |
| <i>Mekongiella xizangensis</i>       | 34.3 | 34.9 | 12.6 | 18.2 | 19.9 | 45.6 | 19.6 | 14.8 | 41.4 | 42.1 | 9.9  | 6.5  | 31.9 | 40.9 | 14.1 | 13.2 |
| <i>Mekongiana xiangchengensis</i>    | 34.5 | 35.8 | 11.8 | 17.9 | 21.2 | 45.7 | 18.8 | 14.3 | 40.7 | 43.8 | 8.8  | 6.8  | 32.1 | 41.8 | 13.1 | 13.0 |
| <i>Euchorthippus fusigeniculatus</i> | 33.2 | 35.3 | 12.0 | 19.6 | 19.7 | 45.8 | 20.2 | 14.4 | 43.6 | 45.7 | 5.9  | 4.7  | 32.2 | 42.2 | 12.7 | 12.9 |
| <i>Gomphocerippus rufus</i>          | 32.4 | 35.2 | 12.4 | 20.0 | 19.6 | 45.6 | 20.4 | 14.4 | 43.1 | 45.1 | 6.9  | 4.9  | 31.7 | 42.0 | 13.2 | 13.1 |
| <i>Ellipes minuta</i>                | 30.4 | 30.6 | 17.1 | 22.0 | 18.8 | 44.6 | 20.9 | 15.7 | 34.3 | 36.1 | 19.1 | 10.5 | 27.8 | 37.1 | 19.0 | 16.1 |
