# Supplementary material for: Complete Mitochondrial Genome of the Free-Living Earwig, Challia fletcheri (Dermaptera: Pygidicranidae) and Phylogeny of Polyneoptera
Source: PubMed Central journal article supplement (PMC3412835; doi:10.1371/journal.pone.0042056), 2012-08-06
Supplement: pone.0042056.s005.pdf [file pone.0042056.s005.pdf]

|                                      |      |        |        |      |        |        |      |        |        |
|--------------------------------------|------|--------|--------|------|--------|--------|------|--------|--------|
| <i>Reticulitermes santonensis</i>    | 63.0 | 0.186  | -0.266 | 67.1 | -0.532 | 0.353  | 64.5 | -0.099 | -0.045 |
| <i>Reticulitermes hageni</i>         | 62.5 | 0.186  | -0.261 | 65.7 | -0.534 | 0.334  | 63.7 | -0.099 | -0.044 |
| <i>Reticulitermes virginicus</i>     | 63.0 | 0.187  | -0.268 | 67.4 | -0.514 | 0.347  | 64.7 | -0.094 | -0.050 |
| <i>Reticulitermes flavipes</i>       | 63.1 | 0.188  | -0.269 | 67.3 | -0.521 | 0.349  | 64.7 | -0.096 | 0.303  |
| Orthoptera                           |      |        |        |      |        |        |      |        |        |
| <i>Deracantha onos</i>               | 65.9 | -0.093 | -0.266 | 70.7 | -0.227 | 0.319  | 67.7 | -0.145 | -0.068 |
| <i>Troglophilus neglectus</i>        | 70.6 | -0.121 | -0.206 | 75.5 | -0.213 | 0.285  | 72.5 | -0.158 | -0.039 |
| <i>Anabrus simplex</i>               | 65.7 | -0.114 | -0.253 | 70.7 | -0.255 | 0.318  | 67.6 | -0.170 | -0.054 |
| <i>Gampsocleis gratiosa</i>          | 61.1 | -0.074 | -0.292 | 67.5 | -0.283 | 0.334  | 63.6 | -0.159 | -0.077 |
| <i>Ruspolia dubia</i>                | 68.5 | -0.121 | -0.202 | 72.2 | -0.233 | 0.297  | 69.9 | -0.166 | -0.024 |
| <i>Myrmecophilus manni</i>           | 67.7 | -0.057 | -0.292 | 71.0 | -0.259 | 0.330  | 69.0 | -0.138 | -0.067 |
| <i>Gryllotalpa orientalis</i>        | 67.9 | -0.099 | -0.277 | 71.8 | -0.254 | 0.392  | 69.4 | -0.160 | -0.043 |
| <i>Teleogryllus emma</i>             | 71.1 | -0.033 | -0.208 | 74.8 | -0.314 | 0.358  | 72.6 | -0.145 | -0.007 |
| <i>Gryllotalpa pluvialis</i>         | 69.4 | -0.104 | -0.273 | 73.9 | -0.240 | 0.418  | 71.2 | -0.158 | -0.031 |
| <i>Elimaea cheni</i>                 | 69.9 | -0.119 | -0.213 | 73.9 | -0.202 | -0.351 | 71.5 | -0.152 | -0.013 |
| <i>Acrida willemsei</i>              | 73.9 | 0.044  | -0.114 | 77.7 | -0.370 | 0.218  | 75.4 | -0.120 | 0.002  |
| <i>Schistocerca gregaria</i>         | 70.4 | 0.017  | -0.141 | 75.1 | -0.373 | 0.219  | 72.2 | -0.139 | -0.018 |
| <i>Gomphocerus licenti</i>           | 73.4 | -0.006 | -0.091 | 75.6 | -0.382 | 0.066  | 74.3 | -0.153 | 0.017  |
| <i>Arcyptera coreana</i>             | 74.4 | 0.002  | -0.093 | 78.0 | -0.329 | 0.172  | 75.8 | -0.129 | 0.000  |
| <i>Chorthippus chinensis</i>         | 73.8 | 0.008  | -0.117 | 76.8 | -0.358 | 0.200  | 74.9 | -0.137 | -0.004 |
| <i>Phlaeoba albonema</i>             | 72.0 | 0.025  | -0.118 | 75.9 | -0.370 | 0.234  | 73.5 | -0.132 | 0.005  |
| <i>Oxya chinensis</i>                | 73.7 | -0.022 | -0.083 | 77.5 | -0.346 | 0.197  | 75.2 | -0.150 | 0.014  |
| <i>Calliptamus italicus</i>          | 70.8 | 0.004  | -0.131 | 75.0 | -0.356 | 0.221  | 72.4 | -0.139 | -0.008 |
| <i>Prumna arctica</i>                | 73.4 | -0.002 | -0.112 | 78.0 | -0.347 | 0.163  | 75.2 | -0.139 | -0.018 |
| <i>Traulia szetschuanensis</i>       | 72.4 | 0.011  | -0.117 | 76.3 | -0.359 | 0.219  | 73.9 | -0.135 | 0.000  |
| <i>Ognevia longipennis</i>           | 73.8 | -0.019 | -0.101 | 77.6 | -0.330 | 0.219  | 75.2 | -0.142 | 0.010  |
| <i>Oedaleus decorus asiaticus</i>    | 72.2 | 0.093  | -0.172 | 76.6 | -0.387 | 0.198  | 73.9 | -0.098 | -0.041 |
| <i>Gastrimargus marmoratus</i>       | 73.4 | -0.006 | -0.091 | 75.6 | -0.382 | 0.204  | 73.9 | -0.153 | 0.017  |
| <i>Locusta migratoria migratoria</i> | 72.6 | 0.065  | -0.167 | 76.7 | -0.385 | 0.174  | 74.2 | -0.114 | -0.045 |
| <i>Locusta migratoria</i>            | 72.6 | 0.068  | -0.168 | 76.5 | -0.389 | 0.199  | 74.1 | -0.113 | -0.040 |

---

|                                      |      |        |        |      |        |       |      |        |        |
|--------------------------------------|------|--------|--------|------|--------|-------|------|--------|--------|
| <i>Locusta migratoria tibetensis</i> | 72.7 | 0.065  | -0.168 | 76.6 | -0.381 | 0.192 | 74.2 | -0.112 | -0.043 |
| <i>Locusta migratoria manilensis</i> | 72.6 | 0.067  | -0.166 | 76.5 | -0.383 | 0.195 | 74.1 | -0.112 | -0.040 |
| <i>Atractomorpha sinensis</i>        | 72.6 | 0.026  | -0.129 | 75.1 | -0.393 | 0.244 | 73.6 | -0.137 | 0.005  |
| <i>Gomphocerus sibiricus</i>         | 72.8 | -0.043 | -0.091 | 76.6 | -0.363 | 0.204 | 74.3 | -0.146 | 0.012  |
| <i>Acrida cinerea</i>                | 73.8 | 0.047  | -0.111 | 77.7 | -0.368 | 0.205 | 75.3 | -0.118 | -0.001 |
| <i>Thrinchus schrenkii</i>           | 69.1 | 0.025  | -0.187 | 73.3 | -0.391 | 0.261 | 70.7 | -0.141 | -0.030 |
| <i>Physemacris variolosa</i>         | 71.6 | 0.067  | -0.254 | 75.9 | -0.325 | 0.218 | 73.3 | -0.089 | -0.090 |
| <i>Xyleus modestus</i>               | 70.0 | 0.043  | -0.160 | 73.3 | -0.412 | 0.274 | 71.3 | -0.137 | -0.005 |
| <i>Mekongiella xizangensis</i>       | 71.7 | 0.032  | -0.191 | 74.5 | -0.364 | 0.252 | 72.8 | -0.123 | -0.033 |
| <i>Mekongiana xiangchengensis</i>    | 72.7 | 0.018  | -0.148 | 75.8 | -0.360 | 0.251 | 73.9 | -0.131 | -0.006 |
| <i>Euchorthippus fusigeniculatus</i> | 73.1 | 0.003  | -0.101 | 76.5 | -0.348 | 0.206 | 74.4 | -0.135 | 0.007  |
| <i>Gomphocerippus rufus</i>          | 72.0 | 0.009  | -0.121 | 76.2 | -0.365 | 0.217 | 73.7 | -0.139 | -0.004 |
| <i>Ellipes minuta</i>                | 63.6 | -0.101 | -0.171 | 66.9 | -0.207 | 0.286 | 64.9 | -0.143 | -0.084 |

---
