# Supplementary material for: Complete Mitochondrial Genome of the Free-Living Earwig, Challia fletcheri (Dermaptera: Pygidicranidae) and Phylogeny of Polyneoptera
Source: PubMed Central journal article supplement (PMC3412835; doi:10.1371/journal.pone.0042056), 2012-08-06
Supplement: pone.0042056.s006.pdf [file pone.0042056.s006.pdf]

**Table S4 Results of topological tests for two datasets, showing values from six statistical tests performed.**

| tests | dataset   |           |
|-------|-----------|-----------|
|       | PCG123RNA | PCG12RNA  |
| ELW   | 0.6871765 | 0.9225586 |
| BP    | 0.6874    | 0.92278   |
| KH    | 1         | 1         |
| SH    | 1         | 1         |
| WSH   | 1         | 1         |
| AU    | 0.6813492 | 0.925226  |

The full topology obtained from the dataset PCG123RNA is presented in Figure 7A, while that from PCG12RNA is presented in Figure 7B.
